# Supplementary material
Source: PubMed Central journal article supplement (PMC4025512)
Supplement: supp_bju015_Fischl_significant_genes.pdf [file supp_bju015_Fischl_significant_genes.pdf]

| Probe Set ID | Gene Symbol                          | Entrez Gene ID        | Fold-differenc | P-value  |
|--------------|--------------------------------------|-----------------------|----------------|----------|
| 6966497      | 100042424 /// Pcd5                   | 100042424 /// 56330   | 0.7171148      | 0.034774 |
| 6911703      | 1110037F02Rik                        | 66185                 | 0.98284558     | 0.043503 |
| 6792919      | 1700012B15Rik                        | 74173                 | 1.06818658     | 0.04971  |
| 6904806      | 1700018B24Rik                        | 66332                 | 1.1950895      | 0.010103 |
| 6774995      | 1700049L16Rik                        | 108950                | 0.97621444     | 0.003612 |
| 6771894      | 1700052N19Rik                        | 73419                 | 0.86920397     | 0.025686 |
| 6868023      | 1810006K21Rik                        | 69038                 | 0.87931135     | 0.02501  |
| 6792769      | 1810049H13Rik                        | 66431                 | 0.93069928     | 0.008913 |
|              |                                      | 72374 /// 74575 ///   |                |          |
|              | 2210416J07Rik /// 4833406M21Rik ///  | 321002 /// 319461 /// |                |          |
|              | B930063P07Rik /// D230040N21Rik ///  | 319610 /// 238871 /// |                |          |
| 6810067      | 9530083O12Rik /// Pde4d /// AI452195 | 105178                | 0.84501274     | 0.00384  |
| 6881625      | 2310003L22Rik                        | 69487                 | 0.83063275     | 0.018684 |
| 6752068      | 2310035C23Rik                        | 227446                | 1.03113984     | 0.015708 |
| 6846388      | 2310061J03Rik                        | 66391                 | 0.83452876     | 0.049453 |
| 6970302      | 2610204K14Rik /// Olfr482            | 67148 /// 258728      | 0.60937434     | 0.03762  |
| 6964730      | 2700050L05Rik                        | 214764                | 0.96885813     | 0.019065 |
| 6800912      | 2700097O09Rik                        | 72658                 | 0.89951713     | 0.00889  |
| 6989974      | 2810417H13Rik                        | 68026                 | 1.07897392     | 0.001309 |
| 6839528      | 3110001I22Rik /// Bfar               | 66598 /// 67118       | 0.94248463     | 0.00251  |
| 6916502      | 4732418C07Rik                        | 230648                | 0.92056128     | 0.03362  |
| 6918310      | 4732496O08Rik                        | 242736                | 0.88649066     | 0.008025 |
| 6913001      | 4930417M19Rik                        | 320571                | 0.85699281     | 0.016896 |
| 6813447      | 4930451E10Rik                        | 78111                 | 1.15209791     | 0.009243 |
| 6825364      | 4930578I06Rik                        | 67750                 | 0.92838793     | 0.002164 |
| 6881185      | 4933425O20Rik                        | 66766                 | 1.2325752      | 0.028626 |
| 6899308      | 4933434E20Rik                        | 99650                 | 0.95401752     | 0.041048 |
| 6771048      | 5330439M10Rik                        | 78237                 | 1.21534957     | 0.046581 |
| 6987325      | 5730577I03Rik                        | 66662                 | 1.09829961     | 0.043019 |
| 6838398      | 5830427D03Rik                        | 76061                 | 1.16061569     | 0.022476 |
| 6802031      | 6330442E10Rik /// EG432460           | 268567 /// 432460     | 0.84806123     | 0.013664 |
| 6949310      | 8430408G22Rik                        | 213393                | 0.8157566      | 0.007747 |
| 6884235      | 9230112E08Rik                        | 320800                | 0.79461449     | 0.0394   |
| 6885891      | 9430097D07Rik                        | 319245                | 1.22897707     | 0.010996 |
| 6870615      | 9930023K05Rik                        | 226245                | 0.91923629     | 0.046909 |
| 6917063      | 9930104L06Rik                        | 194268                | 0.9060509      | 0.021988 |
| 6756474      | A130010J15Rik                        | 319266                | 0.94320853     | 0.017165 |
| 6798258      | A530016L24Rik                        | 319942                | 1.04004888     | 0.046503 |
| 6850831      | A530064D06Rik /// B430306N03Rik      | 328830 /// 320148     | 1.12357778     | 0.001777 |
| 6969669      | A630091E08Rik                        | 233544                | 1.16132626     | 0.043564 |
| 6885375      | A830007P12Rik                        | 227612                | 0.94483196     | 0.015095 |
| 6933399      | A830023I12Rik                        | 320875                | 1.08486937     | 0.016949 |
| 6946750      | A930038C07Rik                        | 68169                 | 0.76326344     | 0.004319 |
| 6967022      | Abcc6                                | 27421                 | 1.04231355     | 0.020802 |
| 6863326      | Abhd3                                | 106861                | 0.83355733     | 0.011762 |

|                                 |                  |        |            |          |
|---------------------------------|------------------|--------|------------|----------|
| 6841712 Abi3bp                  |                  | 320712 | 0.86789214 | 0.006901 |
| 6783063 Acaca                   |                  | 107476 | 0.91920614 | 0.036043 |
| 6792500 Acox1                   |                  | 11430  | 0.92991236 | 0.007184 |
| 6937434 Acox3 /// 4931431C16Rik | 80911 /// 74364  |        | 0.90153329 | 0.002942 |
| 6881028 Acox1                   |                  | 74121  | 1.06201612 | 0.038753 |
| 6964036 Acp1 /// Prkcb          | 11431 /// 18751  |        | 0.80285369 | 0.046677 |
| 6790960 Acsf2                   |                  | 264895 | 0.78891075 | 0.027168 |
| 6781029 Acsl6                   |                  | 216739 | 0.9014129  | 0.01521  |
| 6876914 Acvr2a                  |                  | 11480  | 1.12032709 | 0.03024  |
| 6828747 Adamts12                |                  | 239337 | 0.86353367 | 0.044311 |
| 6843634 Adcy9 /// 4933427I04Rik | 11515 /// 664620 |        | 0.86373221 | 0.01094  |
| 6956912 Adipor2                 |                  | 68465  | 0.85925287 | 0.045632 |
| 6874000 Afap1l2                 |                  | 226250 | 0.86569636 | 0.019253 |
| 6805797 Agtr1a                  |                  | 11607  | 0.94353853 | 0.000104 |
| 6749044 Al597479                |                  | 98404  | 0.89776079 | 0.049629 |
| 6915843 Ak3l1                   |                  | 11639  | 0.85699914 | 0.049191 |
| 6809372 Ankra2                  |                  | 68558  | 0.92266489 | 0.049483 |
| 6750600 Ankzf1                  |                  | 52231  | 1.04418331 | 0.031033 |
| 6972473 Ano1                    |                  | 101772 | 0.78202574 | 0.04143  |
| 6949885 Ano2                    |                  | 243634 | 0.85555154 | 0.042314 |
| 6989732 Anp32a /// Anp32-ps     | 11737 /// 448829 |        | 0.91192642 | 0.035103 |
| 6968735 Anpep                   |                  | 16790  | 0.77613759 | 0.028049 |
| 6833175 Aqp5                    |                  | 11830  | 0.91232832 | 0.024269 |
| 6996678 Aqp9                    |                  | 64008  | 0.87065677 | 0.04789  |
| 6836691 Arc                     |                  | 11838  | 1.0884333  | 0.041833 |
| 6932951 Arhgap24                |                  | 231532 | 0.83250394 | 0.025414 |
| 6755176 Arhgap30                |                  | 226652 | 0.9472278  | 0.039027 |
| 6974254 Arhgef10                |                  | 234094 | 0.88975806 | 0.029537 |
| 6810371 Arl15                   |                  | 218639 | 0.89563325 | 0.030164 |
| 6760518 Arl4c                   |                  | 320982 | 0.90601552 | 0.009656 |
| 6951107 Arntl2                  |                  | 272322 | 1.10315206 | 0.013344 |
| 6876570 Arpc5l                  |                  | 74192  | 0.88740423 | 0.047008 |
| 6972329 Ascl2                   |                  | 17173  | 1.1208475  | 0.004826 |
| 6789316 Atp1b2                  |                  | 11932  | 0.81560941 | 0.021793 |
| 6866118 Atp8b1                  |                  | 54670  | 0.92998499 | 0.030023 |
| 6994790 AW551984                |                  | 244810 | 0.89904818 | 0.038942 |
| 6965982 Axl                     |                  | 26362  | 0.87046207 | 0.038457 |
| 6854985 B3galt4                 |                  | 54218  | 1.17289592 | 0.04459  |
| 7009872 B630019K06Rik           |                  | 102941 | 1.1742913  | 0.034073 |
| 6994383 Barx2                   |                  | 12023  | 0.96266851 | 0.00661  |
| 6917219 BC003266                |                  | 80284  | 0.65832049 | 0.027699 |
| 6868511 BC016495                |                  | 225994 | 0.90612187 | 0.008642 |
| 6940333 BC062109                |                  | 231503 | 1.08267807 | 0.034872 |
| 6982649 BC088983                |                  | 382010 | 0.93419848 | 0.009446 |
| 6966135 BC089491                |                  | 280621 | 1.05494443 | 0.036079 |
| 6916322 Bend5                   |                  | 67621  | 0.979643   | 0.037813 |
| 6824266 Bmp4                    |                  | 12159  | 0.79764627 | 0.043219 |

|                                       |                     |            |          |
|---------------------------------------|---------------------|------------|----------|
| 6825509 Bnip3l /// ENSMUSG00000073198 | 12177 /// 100043324 | 0.91422151 | 0.01358  |
| 6983265 Bst2                          | 69550               | 0.86858343 | 0.033969 |
| 6970568 Btbd10                        | 68815               | 0.90153849 | 0.0153   |
| 6939931 Btc                           | 12223               | 1.0803609  | 0.02802  |
| 6937986 C030015E24Rik /// Kcnip4      | 77415 /// 80334     | 1.10971151 | 0.02025  |
| 6769012 C330046G03Rik                 | 252974              | 1.15597404 | 0.044623 |
| 6804511 Calm4 /// Calm5               | 80796 /// 494124    | 1.20011889 | 0.023362 |
| 6810682 Calml3                        | 70405               | 0.8278154  | 0.033022 |
| 6934670 Caln1                         | 140904              | 0.90425527 | 0.035096 |
| 6901138 Camk2d                        | 108058              | 1.06280236 | 0.048289 |
| 6755853 Capn8                         | 170725              | 0.79603292 | 0.036697 |
| 6950639 Capza3                        | 12344               | 1.3344063  | 0.00114  |
| 6944372 Cav1                          | 12389               | 0.86100688 | 0.020802 |
| 6901962 Ccbl2                         | 229905              | 0.84115738 | 0.04114  |
| 6945004 Ccdc136                       | 232664              | 0.90480031 | 0.028828 |
| 6841110 Ccdc52                        | 212514              | 1.0433431  | 0.03181  |
| 6788393 Ccdc69                        | 52570               | 0.90855242 | 0.026787 |
| 6999522 Cck                           | 12424               | 0.68628465 | 0.041504 |
| 6898972 Cd1d2 /// Cd1d1               | 12480 /// 12479     | 1.20844907 | 0.033875 |
| 6984926 Cdh16                         | 12556               | 1.11608739 | 0.022958 |
| 6892987 Cdh22                         | 104010              | 0.8915387  | 0.020115 |
| 6885903 Cdk9                          | 107951              | 1.03510707 | 0.021764 |
| 6780895 Cdkl3                         | 213084              | 0.97968646 | 0.022532 |
| 6965950 Ceacam2 /// Ceacam1           | 26367 /// 26365     | 0.90155953 | 0.003092 |
| 6846386 Cep97                         | 74201               | 1.09701075 | 0.002823 |
| 6749735 Cflar                         | 12633               | 0.86642974 | 0.03864  |
| 6996703 Cgnl1                         | 68178               | 0.87101411 | 0.044481 |
| 6818665 Cgrf1                         | 68755               | 0.85151981 | 0.02162  |
| 6895702 Chmp4c                        | 66371               | 0.83072757 | 0.015427 |
| 6819893 Chrna2                        | 110902              | 0.93854013 | 0.026414 |
| 6956558 Cidec                         | 14311               | 0.93436167 | 0.016713 |
| 6841865 Clnd1                         | 224250              | 1.11633627 | 0.039133 |
| 6949727 Clec4a3                       | 73149               | 0.84929697 | 0.041154 |
| 7011893 Cnga2                         | 12789               | 0.83752065 | 0.048351 |
| 6787967 Cnot6                         | 104625              | 1.09317169 | 0.02612  |
| 6979224 Cntnap4                       | 170571              | 1.15455134 | 0.00614  |
| 6887286 Cobll1                        | 319876              | 0.91116864 | 0.033875 |
| 6826016 Cog3 /// ENSMUSG00000053632   | 338337 /// 791335   | 0.92301116 | 0.035086 |
| 6783435 Coil                          | 12812               | 0.8472923  | 0.046888 |
| 6884237 Col20a1                       | 73368               | 1.1031309  | 0.028432 |
| 6970839 Coq7                          | 12850               | 0.8602437  | 0.020541 |
| 6834951 Cox6c /// EG621837            | 12864 /// 621837    | 0.7555906  | 0.027321 |
| 6949075 Cpne9                         | 211232              | 1.0357609  | 0.04938  |
| 6815259 Crhbp                         | 12919               | 1.12407269 | 0.003248 |
| 6832146 Csd2                          | 105859              | 0.89002391 | 0.038151 |
| 6876072 Cstad                         | 78617               | 0.79489268 | 0.033807 |
| 6898719 Ctso                          | 229445              | 0.82931092 | 0.04708  |

|                                            |                       |        |            |          |
|--------------------------------------------|-----------------------|--------|------------|----------|
| 6760051 Cul3                               |                       | 26554  | 1.14033417 | 0.036641 |
| 6974137 Cul4a                              |                       | 99375  | 0.95479748 | 0.016765 |
| 7018564 Cxcr3                              |                       | 12766  | 1.33444391 | 0.001631 |
| 6762024 Cxcr4                              |                       | 12767  | 1.02335025 | 0.043466 |
| 6862751 Cyb5                               |                       | 109672 | 0.87217729 | 0.022992 |
| Cyp2d40 /// Cyp2d13 /// Cyp2d9 ///         | 71754 /// 68444 ///   |        |            |          |
| 6837409 Cyp2d10                            | 13105 /// 13101       |        | 1.23187198 | 0.017414 |
| 6921985 D630039A03Rik                      |                       | 242484 | 0.79743343 | 0.048064 |
| 6921918 D730040F13Rik                      |                       | 242474 | 0.93354103 | 0.029778 |
| 6782496 Dbil5                              |                       | 13168  | 1.14816289 | 0.037804 |
| 6784605 Ddx42                              |                       | 72047  | 1.04155811 | 0.018294 |
| 6830505 Depdc6 /// ENSMUSG00000053749      | 97998 /// 791337      |        | 0.78510617 | 0.043057 |
| 6844329 Dgcr8                              |                       | 94223  | 1.04024018 | 0.043661 |
| 6763144 Dhx9                               |                       | 13211  | 1.03455236 | 0.041915 |
| 6802727 Dio2                               |                       | 13371  | 1.12395427 | 0.031834 |
| 6880513 Dll4 /// OTTMUSG00000015946        | 54485 /// 100038511   |        | 0.96779586 | 0.006696 |
| 6839057 Dnaja3                             |                       | 83945  | 0.92572291 | 0.000687 |
| 6778068 Dnajc14 /// Ormdl2                 | 74330 /// 66844       |        | 0.8461977  | 0.028264 |
| 6900644 Dph5 /// Ccrn4l                    | 69740 /// 12457       |        | 1.04208094 | 0.009605 |
| 6899222 Dpm3                               |                       | 68563  | 0.80199714 | 0.047488 |
| 6865100 Dpysl3                             |                       | 22240  | 1.06306268 | 0.039752 |
| 7013867 Drp2                               |                       | 13497  | 0.876849   | 0.044297 |
|                                            | 211924 /// 225256 /// |        |            |          |
| 6859279 Dsg1c /// Dsg1b /// Dsg1a          | 13510                 |        | 1.14927576 | 0.010608 |
| 6955175 Dusp11                             |                       | 72102  | 0.96063948 | 0.003284 |
| 6957251 Dyrk4                              |                       | 101320 | 1.20545016 | 0.00368  |
| 6913902 E130308A19Rik                      |                       | 230259 | 0.81876254 | 0.037629 |
| 6827159 Ednrb                              |                       | 13618  | 0.90409775 | 0.046932 |
| 6969255 Eed                                |                       | 13626  | 0.97099942 | 0.006769 |
| 6812518 Eef1e1                             |                       | 66143  | 0.8878944  | 0.035223 |
| 6789851 Efcab5                             |                       | 319634 | 1.15213704 | 0.044665 |
| 6856480 Efna5                              |                       | 13640  | 0.75156251 | 0.041137 |
|                                            | 233164 /// 330513 /// |        |            |          |
| 6966621 EG233164 /// EG330513 /// EG434172 | 434172                |        | 1.14863758 | 0.007843 |
| 6807544 EG328264                           |                       | 328264 | 1.05406902 | 0.038279 |
| EG545253 /// Arhgap26 ///                  | 545253 /// 71302 ///  |        |            |          |
| 6860259 9630014M24Rik                      | 381155                |        | 1.03991168 | 0.017036 |
| 6993854 Elavl3                             |                       | 15571  | 1.07946016 | 0.029362 |
| 6924515 Elavl4                             |                       | 15572  | 1.14366353 | 0.003874 |
| 6902440 Eltd1                              |                       | 170757 | 0.82645204 | 0.020185 |
| 6803030 Eml5                               |                       | 319670 | 1.83639787 | 0.032097 |
| 6929517 En2 /// Mym                        | 13799 /// 114775      |        | 0.8579065  | 0.001381 |
| 6925776 Epb4.1                             |                       | 269587 | 1.01214782 | 0.021422 |
| 6921929 Epb4.1l4b                          |                       | 54357  | 0.8357245  | 0.011237 |
| 6933252 Ephx4                              |                       | 384214 | 0.79660163 | 0.016591 |
| 7018582 Ercc6l                             |                       | 236930 | 0.89770292 | 0.026249 |
| 6844160 F830005K03Rik                      |                       | 442816 | 1.11100502 | 0.039659 |

|                                     |                      |        |            |          |
|-------------------------------------|----------------------|--------|------------|----------|
| 6822477 Fam107a                     |                      | 268709 | 0.9598849  | 0.040245 |
| 7016887 Fam122b                     |                      | 78755  | 0.96352656 | 0.002262 |
| 6775301 Fam148c                     |                      | 237397 | 0.96870727 | 0.008118 |
| 6781607 Fam18b                      |                      | 67510  | 0.89375419 | 0.005009 |
| 6948328 Fam19a1                     |                      | 320265 | 1.18540934 | 0.018798 |
| 6907864 Fam19a3                     |                      | 329731 | 1.09043492 | 0.013756 |
| 6988898 Fam55d                      |                      | 244853 | 0.89263194 | 0.019957 |
| 6813797 Fbp1                        |                      | 14121  | 0.72320104 | 0.000221 |
| 6996389 Fbxl22                      |                      | 74165  | 0.91978846 | 0.025379 |
| 6898873 Fbxw7                       |                      | 50754  | 0.91466055 | 0.015652 |
| 6764040 Fcgr3                       |                      | 14131  | 0.78246367 | 0.002873 |
| 6962999 Fchsd2 /// 1110034A24Rik    | 207278 /// 109065    |        | 0.92192566 | 0.012378 |
| 6840094 Fetub                       |                      | 59083  | 1.12072579 | 0.030981 |
| 6948034 Fgd5                        |                      | 232237 | 0.92375553 | 0.009898 |
| 7013165 Fgf16                       |                      | 80903  | 0.90854151 | 0.011468 |
| 6981854 Fgf20                       |                      | 80857  | 1.08799958 | 0.043601 |
| 6880087 Fmn1                        |                      | 14260  | 0.91786232 | 0.021026 |
| 6755323 Fmn2                        |                      | 54418  | 0.92618224 | 0.008892 |
| 6785550 Fn3k                        |                      | 63828  | 0.86580218 | 0.015343 |
| 6968781 Furin                       |                      | 18550  | 0.82843649 | 0.039655 |
| 6778355 Gal3st1                     |                      | 53897  | 0.88468944 | 0.000229 |
| 6867742 Gal3st3                     |                      | 545276 | 0.96278818 | 0.029083 |
| 6933447 Galnt9                      |                      | 231605 | 0.90848945 | 0.039855 |
| 6858842 Gata6                       |                      | 14465  | 0.92984941 | 0.008558 |
| 6824000 Gcap14                      |                      | 72972  | 1.11143995 | 0.007539 |
| 6785450 Gcgr                        |                      | 14527  | 1.05460568 | 0.033224 |
| 6929702 Gckr                        |                      | 231103 | 1.19979201 | 0.020813 |
| 6798946 Gen1                        |                      | 209334 | 1.05912094 | 0.017254 |
| 6791913 Gh                          |                      | 14599  | 1.1663111  | 0.000321 |
| 6878028 Gm1631                      |                      | 381371 | 1.11561301 | 0.045282 |
| 6980993 Golga7                      |                      | 57437  | 0.94898246 | 0.000113 |
| 6916562 Gpbp1l1                     |                      | 77110  | 0.93430403 | 0.030169 |
| 6875564 Gpr158                      |                      | 241263 | 1.2912294  | 0.009481 |
| 6836627 Gpr20                       |                      | 239530 | 1.15906997 | 0.016743 |
| 6762397 Gpr37l1                     |                      | 171469 | 0.88960327 | 0.007675 |
| 6752732 Gpr39 /// Lypd1             | 71111 /// 72585      |        | 1.10369356 | 0.009826 |
| 6965906 GriK5                       |                      | 14809  | 0.92006966 | 0.017542 |
|                                     | 76758 /// 450219 /// |        |            |          |
| 6784034 Gsdma2 /// Gsdma3 /// Gsdma | 57911                |        | 1.16368238 | 0.042513 |
| 6845957 Gtpbp8                      |                      | 66067  | 0.94410922 | 0.014993 |
| 6825258 Gucy1b2                     |                      | 239134 | 0.74414723 | 0.020457 |
| 6906325 Gucy1b3                     |                      | 54195  | 0.8300457  | 0.040679 |
| 6888830 Gyltl1b                     |                      | 228366 | 0.88286739 | 0.021829 |
| 6978932 Has3 /// Chtf8              | 15118 /// 214987     |        | 0.95936187 | 0.036545 |
| 6876136 Hmcn2                       |                      | 665700 | 1.03427393 | 0.045364 |
| 6822138 Hs6st3                      |                      | 50787  | 0.8531092  | 0.034315 |
| 6784238 Hsd17b1                     |                      | 15485  | 1.06738674 | 0.018172 |

|                                          |                       |        |            |          |
|------------------------------------------|-----------------------|--------|------------|----------|
| 6876342 Hspa5                            |                       | 14828  | 0.92738909 | 0.047649 |
| 6785935 Hus1                             |                       | 15574  | 0.87460955 | 0.006226 |
| 6965146 Ifitm1 /// EG665536              | 68713 /// 665536      |        | 0.70519085 | 0.039452 |
| 6923154 Ifna9 /// Ifna5                  | 15972 /// 15968       |        | 1.21764141 | 0.049205 |
|                                          | 381784 /// 676193 /// |        |            |          |
| Igkv6-25 /// LOC676193 /// Igk-V21-4 /// | 626347 /// 626583 /// |        |            |          |
| Igk-V21-2 /// Igk-V28 /// Igk-C ///      | 16114 /// 16071 ///   |        |            |          |
| 6946835 EG637227                         | 637227                |        | 0.86147291 | 0.018049 |
| 6747972 Il17a                            |                       | 16171  | 1.07241378 | 0.026258 |
| 6964428 Inpp5f                           |                       | 101490 | 1.10102991 | 0.031663 |
| 6929510 Insig1                           |                       | 231070 | 0.8254389  | 0.00024  |
| 6878448 Itga4                            |                       | 16401  | 0.86746894 | 0.000216 |
| 6878031 Itga6                            |                       | 16403  | 0.89285739 | 0.010634 |
| 6849481 Itpr3                            |                       | 16440  | 0.83059053 | 0.019766 |
| 6880469 Ivd                              |                       | 56357  | 0.91690659 | 0.009724 |
| 6898063 Kcnab1                           |                       | 16497  | 0.94971201 | 0.019028 |
| 6847948 Kcne1                            |                       | 16509  | 1.07351524 | 0.00705  |
| 6860576 Kcnn2                            |                       | 140492 | 1.21258034 | 0.016898 |
| 6959116 Kcnn4                            |                       | 16534  | 0.79015796 | 0.00049  |
| 6949529 Kdm5a                            |                       | 214899 | 1.04964878 | 0.037484 |
| 6921029 Kif24                            |                       | 109242 | 0.94288954 | 0.046263 |
| 6992439 Kif9                             |                       | 16578  | 0.9323839  | 0.029551 |
| 6982924 Klhl2                            |                       | 77113  | 0.87603252 | 0.033993 |
| 7013389 Klhl4                            |                       | 237010 | 0.86789996 | 0.002343 |
| 6931229 Klhl5                            |                       | 71778  | 0.91343248 | 0.023035 |
| 6791332 Krt12                            |                       | 268482 | 1.07682639 | 0.023655 |
| 6838648 Krt82 /// Krt2-ps1               | 114566 /// 64819      |        | 0.95805497 | 0.027399 |
| Krtap16-8 /// Krtap6-1 ///               | 68484 /// 16700 ///   |        |            |          |
| ENSMUSG00000068075 ///                   | 100093623 ///         |        |            |          |
| 6842999 ENSMUSG00000068074               | 100038757             |        | 0.79348233 | 0.000943 |
| 6976991 Lass1 /// Gdf1                   | 93898 /// 14559       |        | 0.90172244 | 0.029539 |
| 6824967 Lats2                            |                       | 50523  | 0.83376709 | 0.038069 |
| 6884267 Lime1                            |                       | 72699  | 0.94631692 | 0.009191 |
| LOC100044830 /// Acot2 /// Acot1 ///     | 100044830 /// 171210  |        |            |          |
| 6796563 Acot3                            | /// 26897 /// 171281  |        | 0.7519243  | 0.026556 |
| 6956924 LOC100048600 /// Erc1            | 100048600 /// 111173  |        | 0.84670188 | 0.008267 |
| 6845154 Lrrc33                           |                       | 224109 | 0.81790962 | 0.026097 |
| 6992487 Lrrfip2 /// Ascc3                | 71268 /// 77987       |        | 0.95345076 | 0.018744 |
| 6850107 Ly6g6c /// G6b                   | 68468 /// 114763      |        | 0.92021125 | 0.026197 |
| 7011903 Magea4                           |                       | 17140  | 0.7514052  | 0.029097 |
| 6807518 Mak10                            |                       | 78689  | 1.02202229 | 0.027926 |
| 6890712 Mall                             |                       | 228576 | 0.96033789 | 0.016489 |
| 6851669 Man2a1                           |                       | 17158  | 0.80759413 | 0.024446 |
| 6816080 Map3k1                           |                       | 26401  | 0.85677285 | 0.012849 |
| 6940535 Mapk10                           |                       | 26414  | 1.19603532 | 0.003951 |
| 6892903 Matn4                            |                       | 17183  | 0.872452   | 0.021401 |
| 6815518 Mccc2                            |                       | 78038  | 0.87274898 | 0.006221 |

|                               |                   |        |            |          |
|-------------------------------|-------------------|--------|------------|----------|
| 6944293 Mdfic                 |                   | 16543  | 0.86129697 | 0.022484 |
| 6925149 Mfsd2                 |                   | 76574  | 0.92120405 | 0.033884 |
| 6836849 Mfsd3 /// Recql4      | 69572 /// 79456   |        | 0.98217953 | 0.005596 |
| 6796704 Mfsd7c                |                   | 217721 | 0.88257615 | 0.032786 |
| 6966028 Mia1 /// Rab4b        | 12587 /// 19342   |        | 0.76898374 | 0.0366   |
| 7014171 Mid2 /// Eif2c2       | 23947 /// 239528  |        | 0.93373906 | 0.00213  |
| 6907148 Mllt11                |                   | 56772  | 1.09807734 | 0.021989 |
| 6751520 Mlph                  |                   | 171531 | 0.84979534 | 0.040792 |
| 6983604 Mmaa                  |                   | 109136 | 0.930975   | 0.046203 |
| 6919091 Mmel1                 |                   | 27390  | 1.06580315 | 0.008504 |
| 7017014 Mmgt1                 |                   | 236792 | 0.9289267  | 0.017315 |
| 6771703 Mmp19                 |                   | 58223  | 0.8825111  | 0.036411 |
| 7016891 Mospd1                |                   | 70380  | 1.07627991 | 0.011237 |
| 6988707 Mpzl3                 |                   | 319742 | 1.05486156 | 0.018125 |
| 6798939 Msgn1                 |                   | 56184  | 1.26663367 | 0.044246 |
| 6854431 Msln                  |                   | 56047  | 0.87917463 | 0.02608  |
| 6967881 Mtmr15                |                   | 330554 | 0.92274995 | 0.046586 |
| 6878296 Mtx2                  |                   | 53375  | 0.8854164  | 0.009921 |
| 6756790 Mybl1                 |                   | 17864  | 1.23258972 | 0.046594 |
| 6785752 Myl7                  |                   | 17898  | 0.87295549 | 0.023482 |
| 6973939 Myo16                 |                   | 244281 | 0.97268484 | 0.041728 |
| 6793498 Nbas                  |                   | 71169  | 0.84349592 | 0.028248 |
| 6983162 Ncan                  |                   | 13004  | 0.83282734 | 0.004646 |
| 6952168 Ndufa5                |                   | 68202  | 0.7966909  | 0.039598 |
| 6849973 Ndufa7                |                   | 66416  | 0.59702821 | 0.015285 |
| 6862816 Neto1                 |                   | 246317 | 0.88834809 | 0.021656 |
| 6992436 Ngp                   |                   | 18054  | 0.57926042 | 0.011797 |
| 6820015 Nkx2-6                |                   | 18092  | 1.12282986 | 0.02541  |
| 6873025 Noc3l                 |                   | 57753  | 0.95759443 | 0.026672 |
| 6959586 Nphs1                 |                   | 54631  | 1.33815756 | 0.003986 |
| 6754274 Nphs2                 |                   | 170484 | 1.12484301 | 0.012625 |
| 6784042 Nr1d1 /// Thra        | 217166 /// 21833  |        | 0.8735848  | 0.039167 |
| 6948038 Nr2c2                 |                   | 22026  | 0.96395008 | 0.017699 |
| 6886183 Nr6a1                 |                   | 14536  | 0.98096937 | 0.032533 |
| 6980016 Nrp1                  |                   | 18186  | 1.04256452 | 0.022623 |
| 6919407 Nsmaf                 |                   | 18201  | 0.88014086 | 0.043547 |
| 6884892 Nsun6                 |                   | 74455  | 0.95650251 | 0.018513 |
| 6807480 Ntrk2                 |                   | 18212  | 0.77847988 | 0.040789 |
| 6983267 Nxn1                  |                   | 234404 | 0.94306623 | 0.045451 |
| 7010086 Nyx                   |                   | 236690 | 1.06263367 | 0.030477 |
| 6971678 Oat                   |                   | 18242  | 0.81656256 | 0.020962 |
| 6788649 Obscn                 |                   | 380698 | 1.06945418 | 0.020577 |
| 6888441 Olfr1062 /// Olfr1057 | 259082 /// 404325 |        | 0.81421742 | 0.005287 |
| 6888483 Olfr1100              |                   | 258587 | 1.09979731 | 0.011411 |
| 6878829 Olfr1123              |                   | 258347 | 1.3191921  | 0.047416 |
| 6855248 Olfr113               |                   | 258286 | 0.84640614 | 0.030279 |

|                                                     |                       |            |          |
|-----------------------------------------------------|-----------------------|------------|----------|
|                                                     | 258641 /// 258643 /// |            |          |
| 6888535 Olfr1154 /// Olfr1160 /// Olfr1158          | 258639                | 1.0776811  | 0.022385 |
| 6888551 Olfr1180                                    | 258920                | 0.54564593 | 0.026428 |
|                                                     | 258095 /// 258285 /// |            |          |
| 6850333 Olfr119 /// Olfr122 /// Olfr118 /// Olfr121 | 404308 /// 258622     | 0.70586034 | 0.000585 |
| 6850328 Olfr120                                     | 258624                | 0.60142733 | 0.043673 |
| 6878901 Olfr1202                                    | 258454                | 0.73578015 | 0.009243 |
| 6878905 Olfr1206                                    | 258896                | 0.82126326 | 0.021087 |
| 6888607 Olfr1225                                    | 258893                | 0.69910271 | 0.044266 |
| 7012030 Olfr1325                                    | 258393                | 1.31000713 | 0.044003 |
|                                                     | 258214 /// 258331 /// |            |          |
| Olfr1329 /// Olfr1330 /// Olfr1331 ///              | 258159 /// 258394 /// |            |          |
| 6924927 Olfr1519 /// Olfr1333                       | 258265                | 1.05703685 | 0.049781 |
|                                                     | 258329 /// 258828 /// |            |          |
| 6850348 Olfr135 /// Olfr133 /// Olfr134             | 258829                | 0.83637722 | 0.005775 |
| 6780740 Olfr1387                                    | 258465                | 0.62753536 | 0.046746 |
| 6988264 Olfr143                                     | 258802                | 0.69329503 | 0.04713  |
| 6868195 Olfr1444                                    | 258697                | 0.71403152 | 0.030029 |
| 6868211 Olfr1466                                    | 258689                | 0.79782598 | 0.00382  |
| 6824671 Olfr1512                                    | 258424                | 0.79348471 | 0.03947  |
| 6994714 Olfr160 /// Olfr151                         | 80706 /// 406176      | 0.59667876 | 0.035334 |
| 6839891 Olfr168 /// Olfr166                         | 258354 /// 259071     | 1.27231979 | 0.007191 |
| 6846547 Olfr199                                     | 404310                | 0.50650403 | 0.03527  |
| 6781293 Olfr311                                     | 258530                | 0.48573645 | 0.001312 |
| 6876463 Olfr350                                     | 258620                | 0.73126219 | 0.040676 |
| 6945821 Olfr447                                     | 258990                | 0.71978786 | 0.043634 |
| 6790581 Olfr462                                     | 258406                | 0.66324034 | 0.041389 |
| 6963281 Olfr477 /// Olfr476                         | 258928 /// 258926     | 0.383349   | 0.007066 |
| 6963076 Olfr574                                     | 258357                | 1.09451167 | 0.008844 |
| 6824527 Olfr726                                     | 258313                | 0.57918427 | 0.040248 |
| 6771740 Olfr784 /// Olfr780                         | 258724 /// 258281     | 1.27930773 | 0.014509 |
| 6987287 Olfr855                                     | 258517                | 1.64262596 | 0.044249 |
| 6987308 Olfr869                                     | 258550                | 1.40512616 | 0.005114 |
| 6994765 Olfr934                                     | 258434                | 0.75570723 | 0.035241 |
| 6994799 Olfr979                                     | 259112                | 0.74025813 | 0.035499 |
| 6994807 Olfr985                                     | 258854                | 0.83920877 | 0.032519 |
| 6888374 Olfr992                                     | 258865                | 0.65365955 | 0.049513 |
| 6915905 Oma1                                        | 67013                 | 0.92785868 | 0.038524 |
| 6987685 Opcml                                       | 330908                | 0.92982106 | 0.040308 |
| 6999415 Oxsr1                                       | 108737                | 1.05323205 | 0.045509 |
| 6934162 P2rx7                                       | 18439                 | 0.84910841 | 0.007497 |
| 6905422 P2ry13                                      | 74191                 | 0.8270056  | 0.005566 |
| 6879567 Pamr1                                       | 210622                | 0.82517995 | 0.019436 |
| 6869964 Pax2                                        | 18504                 | 1.0546142  | 0.015625 |
| 6885969 Pbx3                                        | 18516                 | 0.90433842 | 0.003124 |
| 6998301 Pccb                                        | 66904                 | 0.94200721 | 0.000515 |
| 6897166 Pcdh10                                      | 18526                 | 1.38323985 | 0.016359 |

|                                   |                   |        |            |          |
|-----------------------------------|-------------------|--------|------------|----------|
| 6860188 Pcdhb14                   |                   | 93885  | 1.07787335 | 0.045613 |
| 6860211 Pcdhb22                   |                   | 93893  | 0.94006277 | 0.000902 |
| 6860167 Pcdhb4                    |                   | 93875  | 1.07549315 | 0.024904 |
| 6843500 Pcp4                      |                   | 18546  | 0.80240027 | 0.023342 |
| 6764046 Pcp4l1                    |                   | 66425  | 1.88860544 | 0.016956 |
| 6881771 Pcsk2                     |                   | 18549  | 1.16220132 | 0.031295 |
| 6871879 Pcsk5                     |                   | 18552  | 0.888709   | 0.000555 |
| 6867677 Pcx                       |                   | 18563  | 0.9220539  | 0.002428 |
| 6748832 Pdc13                     |                   | 68833  | 0.91255094 | 0.041996 |
| 6810084 Pde4d                     |                   | 238871 | 1.16835821 | 0.019238 |
| 6974618 Pdlim5                    |                   | 56376  | 0.86622997 | 0.008963 |
| 6956012 Pdzrn3                    |                   | 55983  | 0.83256184 | 0.034962 |
| 6968728 Pex11a                    |                   | 18631  | 0.80927934 | 0.03337  |
| 6904100 Pex5l                     |                   | 58869  | 1.02335994 | 0.010075 |
| 6758704 Pgap1                     |                   | 241062 | 1.15195365 | 0.028026 |
| 7010327 Phf16                     |                   | 382207 | 1.15409821 | 0.006214 |
| 6846006 Phldb2 /// Plcxd2         | 208177 /// 433022 |        | 0.91543435 | 0.048351 |
| 6933672 Pla2g1b                   |                   | 18778  | 1.05693647 | 0.043352 |
| 6828379 Plcxd3                    |                   | 239318 | 1.36848315 | 0.03325  |
| 6776156 Plxnc1                    |                   | 54712  | 0.87978749 | 0.002719 |
| 6781612 Pmp22                     |                   | 18858  | 0.84331762 | 0.039896 |
| 6907289 Polr3gl                   |                   | 69870  | 0.93604578 | 0.042648 |
| 6916023 Ppap2b                    |                   | 67916  | 0.87498084 | 0.040444 |
| 6938093 Ppargc1a                  |                   | 19017  | 1.21433993 | 0.044643 |
| 6865041 Ppp2r2b                   |                   | 72930  | 0.82426682 | 0.025572 |
| 6901657 Ppp3ca                    |                   | 19055  | 0.90390935 | 0.034024 |
| 6797551 Ppp4r4                    |                   | 74521  | 0.89963394 | 0.007335 |
| 6803192 Prima1                    |                   | 170952 | 0.90269196 | 0.000431 |
| 6872616 Prkg1                     |                   | 19091  | 0.85052959 | 0.044417 |
| 6955269 Prokr1                    |                   | 58182  | 1.04251779 | 0.028723 |
| 6891084 Prokr2                    |                   | 246313 | 0.87716268 | 0.011085 |
| 6854311 Prss22                    |                   | 70835  | 0.88751413 | 0.04481  |
| 6855724 Ptcra                     |                   | 19208  | 1.02862919 | 0.012265 |
| 6952750 Ptn                       |                   | 19242  | 0.74926952 | 0.031496 |
| 6922672 Ptprd /// A230006I23Rik   | 19266 /// 319919  |        | 0.85366385 | 0.035114 |
| 6759789 Ptprn                     |                   | 19275  | 1.25379806 | 0.015644 |
| 6962577 Rab30                     |                   | 75985  | 1.04739479 | 0.046843 |
| 6957252 Rad51ap1                  |                   | 19362  | 0.94217742 | 0.018953 |
| 6889193 Rag1 /// B230118H07Rik    | 19373 /// 68170   |        | 1.131988   | 0.027501 |
| 6917963 Rap1gap                   |                   | 110351 | 0.91352788 | 0.039823 |
| 6940303 Rasgef1b                  |                   | 320292 | 0.92709366 | 0.009175 |
| 6959474 Rasgrp4 /// 1110006G06Rik | 233046 /// 73833  |        | 1.8054611  | 0.01674  |
| 6934584 Rasl2-9 /// Ran           | 19428 /// 19384   |        | 0.70617827 | 0.029494 |
| 6952337 Rbm28                     |                   | 68272  | 1.02726543 | 0.034215 |
| 6939960 Rchy1                     |                   | 68098  | 0.94504854 | 0.019268 |
| 6765281 Rcor3                     |                   | 214742 | 0.91024133 | 0.038652 |
| 6747805 Rdh10                     |                   | 98711  | 0.86361448 | 0.008429 |

|                                |                                   |                     |                   |                     |
|--------------------------------|-----------------------------------|---------------------|-------------------|---------------------|
| 6936589 Reln                   |                                   | 19699               | 0.83844032        | 0.008677            |
| 6917690 Rhd                    |                                   | 19746               | 0.82377676        | 0.0191              |
| 6916836 Rims3                  |                                   | 242662              | 0.67934281        | 0.022741            |
| 6983820 Rln3                   |                                   | 212108              | 1.17538577        | 0.028471            |
| 6754143 Rnasel                 |                                   | 24014               | 1.0410127         | 0.025551            |
| 6854387 Rnf151                 |                                   | 67504               | 0.88955435        | 0.036989            |
| 6840539 Rnf168                 |                                   | 70238               | 1.03056417        | 0.001271            |
| 6922063 Rod1                   |                                   | 230257              | 1.05431795        | 0.045544            |
|                                | Rpl26 /// OTTMUSG00000026108 ///  | 19941 /// 100034726 |                   |                     |
| 6781955 ENSMUSG00000063754 /// | EG217600                          | /// 672214 ///      | 217600            | 0.83882242 0.043847 |
| 6758027 Rpl31 ///              | Tbc1d8                            | 114641 ///          | 54610             | 0.95839127 0.039503 |
|                                | Rpl35a /// OTTMUSG00000021804 /// | 57808 ///           | 100042363         |                     |
|                                | ENSMUSG00000070519 ///            | /// 100042824 ///   |                   |                     |
|                                | ENSMUSG00000057764 ///            | 100039532 ///       |                   |                     |
|                                | ENSMUSG00000068674 ///            | 100043106 ///       |                   |                     |
| 6840603 ENSMUSG00000068324 /// | Ino80                             | 100043217 ///       | 68142             | 0.85964803 0.041518 |
| 6933677 Rplp0                  |                                   |                     | 11837             | 0.82733776 0.013139 |
|                                |                                   | 382985 ///          | 384840 ///        |                     |
|                                | Rrm2b /// EG384840 ///            | EG666548 ///        | 666548 ///        | 666790 ///          |
|                                | EG666790 ///                      | EG664936 ///        | EG631470 ///      | 664936 ///          |
|                                | 100041478 ///                     | EG640803 ///        | 100041478 ///     | 640803              |
|                                | LOC100042058 ///                  | Rpl23a ///          | /// 100042058 /// |                     |
| 6835063 ENSMUSG00000071532     |                                   | 268449 ///          | 100039571         | 1.08151674 0.042522 |
| 6908493 Rtcd1                  |                                   | 66368               | 1.04084603        | 0.018344            |
| 6932224 Rufy3                  |                                   | 52822               | 1.0455775         | 0.039838            |
| 6936088 Rundc3b                |                                   | 242819              | 1.06239726        | 0.039329            |
| 6899373 S100a5                 |                                   | 20199               | 3.59412354        | 0.007696            |
| 6807007 S1pr3                  |                                   | 13610               | 0.81396237        | 0.034211            |
| 6775471 S1pr4                  |                                   | 13611               | 1.04166641        | 0.000502            |
| 6768234 Sar1a                  |                                   | 20224               | 0.84937487        | 0.02841             |
| 6782034 Sat2                   |                                   | 69215               | 0.77478826        | 0.033678            |
| 6873271 Scd1                   |                                   | 20249               | 0.8431263         | 0.019813            |
| 6939178 Scfd2                  |                                   | 212986              | 0.91841281        | 0.006952            |
| 6983782 Scoc                   |                                   | 56367               | 0.80875465        | 0.007398            |
| 6902122 Sep15                  |                                   | 93684               | 0.88528057        | 0.048719            |
| 6892831 Serinc3                |                                   | 26943               | 0.93863099        | 0.045537            |
| 6826081 Serp2                  |                                   | 72661               | 0.81118413        | 0.041399            |
| 6797573 Serpina3a              |                                   | 74069               | 1.04645698        | 0.027458            |
| 6789743 Serpinf2               |                                   | 18816               | 1.10645645        | 0.001989            |
| 6783359 Sfrs1                  |                                   | 110809              | 1.05953653        | 0.012372            |
| 6763752 Sft2d2                 |                                   | 108735              | 0.8938306         | 0.0131              |
| 6885770 Sh3glb2                |                                   | 227700              | 0.92100124        | 0.022049            |
| 6890611 Shc4                   |                                   | 271849              | 0.84540214        | 0.004816            |
| 6782290 Shpk                   |                                   | 74637               | 0.88229927        | 0.03338             |
| 6864585 Sil1                   |                                   | 81500               | 0.86249859        | 0.039231            |
| 6795448 Sip1                   |                                   | 66603               | 0.95049855        | 0.024836            |
| 6780920 Skp1a                  |                                   | 21402               | 0.95260498        | 0.045971            |

|                                              |                       |            |          |
|----------------------------------------------|-----------------------|------------|----------|
| 6960692 Slc17a6                              | 140919                | 1.43883152 | 0.016775 |
| 6754696 Slc19a2                              | 116914                | 0.85766808 | 0.048272 |
| 6879569 Slc1a2                               | 20511                 | 0.79992335 | 0.046804 |
| 6907652 Slc22a15                             | 242126                | 0.9308795  | 0.044347 |
| 6881870 Slc24a3                              | 94249                 | 0.8591284  | 0.042629 |
| 6940933 Slc26a1 /// Idua                     | 231583 /// 15932      | 1.18134772 | 0.004433 |
| 6864696 Slc35a4 /// Apbb3                    | 67843 /// 225372      | 1.05249375 | 0.016661 |
| 6812534 Slc35b3                              | 108652                | 0.90380347 | 0.039079 |
| 6952601 Slc35b4                              | 58246                 | 0.82123992 | 0.040219 |
| 6752730 Slc35f5                              | 74150                 | 0.87854819 | 0.027188 |
| 6753083 Slc41a1                              | 98396                 | 0.83479431 | 0.025465 |
| 6943168 Slc46a3                              | 71706                 | 0.85913237 | 0.019246 |
| 6814347 Slc6a18                              | 22598                 | 1.04295193 | 0.012004 |
| 6824763 Slc7a8                               | 50934                 | 0.79019539 | 0.023287 |
| 6857639 Slc8a1                               | 20541                 | 1.50239066 | 0.009914 |
| 7015941 Slc9a7                               | 236727                | 1.02207637 | 0.049582 |
| 6991461 Slc9a9                               | 331004                | 1.04344026 | 0.01634  |
|                                              | 237887 /// 269261 /// |            |          |
| 6790245 Slfn10 /// Rpl12 /// Slfn8 /// Slfn9 | 276950 /// 237886     | 1.05841225 | 0.013179 |
| 6782979 Slfn5                                | 327978                | 0.83482266 | 0.020105 |
| 6836694 Slurp1                               | 57277                 | 0.96268474 | 0.034969 |
| 6891000 Snrpe /// Rnf24                      | 20643 /// 51902       | 0.92225674 | 0.0117   |
| 6751219 Sp100                                | 20684                 | 0.88034383 | 0.005827 |
| 6797230 Spata7                               | 104871                | 0.92926759 | 0.028412 |
| 6969770 Spcs2                                | 66624                 | 0.82863385 | 0.026322 |
| 6801902 Spnb1                                | 20741                 | 0.89752913 | 0.027706 |
| 6936679 Srpk2 /// Mll5                       | 20817 /// 69188       | 1.05545129 | 0.020581 |
| 6808876 Ssbp2                                | 66970                 | 1.1306011  | 0.048497 |
| 6910668 Stgalnac3                            | 20447                 | 0.83337535 | 0.027492 |
| 6864444 Stard4                               | 170459                | 0.85678968 | 0.036367 |
| 6749392 Stat4                                | 20849                 | 1.09938447 | 0.011015 |
| 6845416 Stfa3                                | 20863                 | 0.61144671 | 0.010187 |
| 6951102 Stk38l                               | 232533                | 1.14509979 | 0.012246 |
| 6775750 Syn3                                 | 27204                 | 1.04538546 | 0.042665 |
| 6765533 Syne1                                | 64009                 | 0.92433454 | 0.04844  |
| 6900116 Syt6                                 | 54524                 | 0.9054553  | 0.009325 |
|                                              | 215856 /// 435206 /// |            |          |
| Taar7a /// Taar7d /// Taar7b /// Taar7e      | 209517 /// 276742 /// |            |          |
| 6766590 /// Taar7f                           | 435207                | 0.65216579 | 0.019622 |
| 6979073 Tat                                  | 234724                | 1.13928577 | 0.001176 |
| 6877588 Tbr1                                 | 21375                 | 0.90738707 | 0.029455 |
| Tcf4 /// 4732423E21Rik ///                   | 21413 /// 106967 ///  |            |          |
| 6861850 6030446J10Rik /// 9630026C02Rik      | 320848 /// 320591     | 1.0879307  | 0.030002 |
| 6951882 Tcfec                                | 21426                 | 0.94282484 | 0.034828 |
| 6870562 Tectb                                | 21684                 | 1.05833767 | 0.043969 |
| 6815058 Thbs4                                | 21828                 | 1.01300432 | 0.04589  |
| 6970904 Thumpd1                              | 233802                | 0.87273627 | 0.016768 |

|                             |                  |            |          |
|-----------------------------|------------------|------------|----------|
| 6813474 Tifab               | 212937           | 0.85350411 | 0.02899  |
| 6762420 Timm17a             | 21854            | 0.9451575  | 0.007016 |
| 7009797 Timm17b             | 21855            | 0.84105186 | 0.028538 |
| 6989019 Timm8b /// AU019823 | 30057 /// 270156 | 0.82745151 | 0.029073 |
| 6989874 Tipin               | 66131            | 0.89966097 | 0.04377  |
| 6763754 Tiprl               | 226591           | 0.85886027 | 0.041465 |
| 6843811 Tmem114             | 74720            | 0.92347811 | 0.044027 |
| 6934061 Tmem116             | 77462            | 0.91787928 | 0.043941 |
| 6969289 Tmem126a            | 66271            | 0.92226718 | 0.006318 |
| 6748011 Tmem14a             | 75712            | 0.91724222 | 0.004794 |
| 6988963 Tmprss5             | 80893            | 1.09901596 | 0.04888  |
| 6896353 Tnfsf10             | 22035            | 0.80572588 | 0.018392 |
| 6843914 Tnp2                | 21959            | 1.23555937 | 0.017047 |
| 6952376 Tnp03               | 320938           | 1.01918551 | 0.012582 |
| 6986775 Trpc6               | 22068            | 0.97590255 | 0.017329 |
| 6986072 Ttc13               | 234875           | 0.90290744 | 0.006936 |
| 6990948 Ttk                 | 22137            | 0.96046193 | 0.023879 |
| 6812214 Tubb2a              | 22151            | 0.59721625 | 0.014113 |
| 6901608 Ube2d3              | 66105            | 1.0438251  | 0.011303 |
| 6757896 Ugcgl1              | 320011           | 0.93785275 | 0.019166 |
| 6909083 Ugt8a               | 22239            | 1.10502269 | 0.017788 |
| 6966301 Upk1a               | 109637           | 0.86222143 | 0.014232 |
| 6896615 Usp13               | 72607            | 0.92140819 | 0.048825 |
| 6959085 V1rd15              | 209824           | 1.48858678 | 0.045719 |
| 6900456 Vav3                | 57257            | 0.89379363 | 0.024899 |
| 6780933 Vdac1               | 22333            | 0.84854907 | 0.036789 |
| 6778939 Vstm2a              | 211739           | 0.77730049 | 0.002946 |
| 6963955 Vwa3a               | 233813           | 0.87269494 | 0.02575  |
| 6899887 Wars2               | 70560            | 0.91294235 | 0.018102 |
| 6942404 Wbscr25             | 71304            | 1.06932149 | 0.015709 |
| 6942395 Wbscr28             | 76629            | 0.97736567 | 0.00484  |
| 6764662 Wdr26               | 226757           | 0.91977465 | 0.029389 |

|                                         |                      |            |          |
|-----------------------------------------|----------------------|------------|----------|
| Xk /// OTTMUSG00000016790 ///           | 22439 /// 547160 /// |            |          |
| OTTMUSG00000016789 ///                  | 100042922 ///        | 76383      |          |
| 1700012L04Rik ///                       | /// 547154 ///       | 333452     |          |
| OTTMUSG00000016887 /// EG333452 ///     | /// 100042927 ///    |            |          |
| 7009896 OTTMUSG00000016779 /// EG385328 | 385328               | 0.8605236  | 0.036986 |
| 6878702 Ypel4                           | 241525               | 1.13341694 | 0.018145 |
| 6767384 Zbtb24                          | 268294               | 0.90707222 | 0.047177 |
| 6775887 Zbtb5 /// Slc17a8               | 230119 /// 216227    | 1.07243311 | 0.044332 |
| 6858575 Zeb1                            | 21417                | 0.87606207 | 0.018844 |
| 6942675 Zfand2a                         | 100494               | 0.87146422 | 0.039785 |
| 6956891 Zfp248                          | 72720                | 0.93416545 | 0.043133 |
| 6838979 Zfp263                          | 74120                | 0.90594142 | 0.012785 |
| 6972598 Zfp296                          | 63872                | 1.18890464 | 0.009486 |
| 6850695 Zfp318                          | 57908                | 0.94457068 | 0.018293 |

|                          |                   |                   |          |
|--------------------------|-------------------|-------------------|----------|
| 6813877 Zfp367 /// Rab5a | 238673 /// 271457 | 0.94031432        | 0.034141 |
| 6945950 Zfp398           |                   | 272347 0.84554318 | 0.002081 |
| 6863540 Zfp521           |                   | 225207 0.88266629 | 0.029102 |
| 6815853 Zswim6           |                   | 67263 0.81365137  | 0.022145 |
